# Supplementary material for: Plasma-Induced Oxidation Products of (–)-Epigallocatechin Gallate with Digestive Enzymes Inhibitory Effects
Source: MDPI journal article supplement (doi:10.3390/molecules26195799), 2021-09-24
Supplement: s1 [file s1]

## **Supplementary Materials**

### **Plasma-Induced Oxidation Products of (–)-Epigallocatechin Gallate with Digestive Enzymes Inhibitory Effects**

**Gyeong Han Jeong and Tae Hoon Kim \***

Department of Food Science and Biotechnology, Daegu University, Gyeongsan  
38453, Korea; jkh4598@hanmail.net

\* Correspondence: skyey7@daegu.ac.kr; Tel.: +82-53-850-6533

# Contents

**Figure S1.** Isolation procedure of plasma irradiated EGCG in aqueous solution.

**Figure S2.** HPLC chromatograms of isolated compounds **1-3**.

**Figure S3.**  $^1\text{H}$  NMR spectrum of compound **1** in  $\text{CD}_3\text{OD}$ .

**Figure S4.**  $^{13}\text{C}$  NMR spectrum of compound **1** in  $\text{CD}_3\text{OD}$ .

**Figure S5.** HSQC spectrum of compound **1** in  $\text{CD}_3\text{OD}$ .

**Figure S6.** HMBC spectrum of compound **1** in  $\text{CD}_3\text{OD}$ .

**Figure S7.** FABMS spectrum of compound **1**.

**Figure S8.**  $^1\text{H}$  NMR spectrum of compound **2** in  $\text{CD}_3\text{OD}$ .

**Figure S9.**  $^{13}\text{C}$  NMR spectrum of compound **2** in  $\text{CD}_3\text{OD}$ .

**Figure S10.** FABMS spectrum of compound **2**.

**Figure S11.**  $^1\text{H}$  NMR spectrum of compound **3** in  $\text{CD}_3\text{OD}$ .

**Figure S12.** Calibration curve of EGCG and oxidation products **1-3**.

**Figure S13.** Chemical structures of isolated compounds **1-3**.

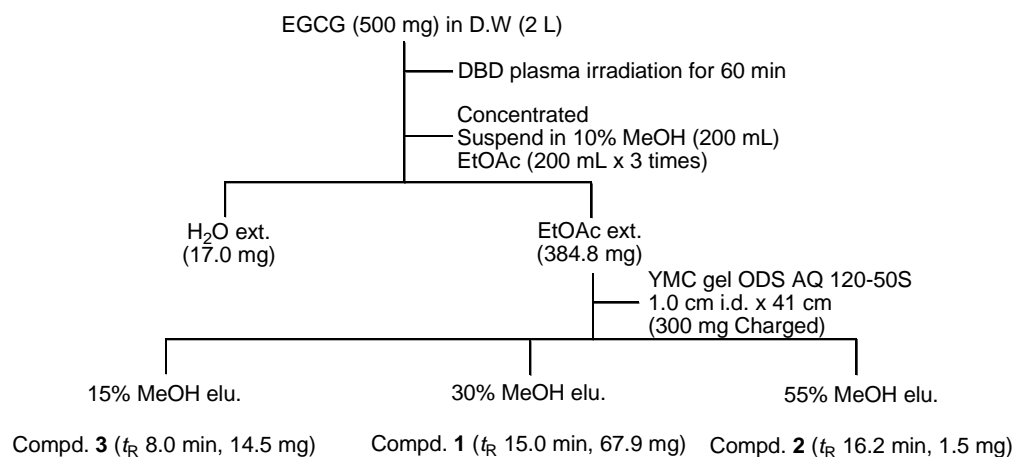

**Figure S1.** Isolation procedure of plasma irradiated EGCG in aqueous solution.

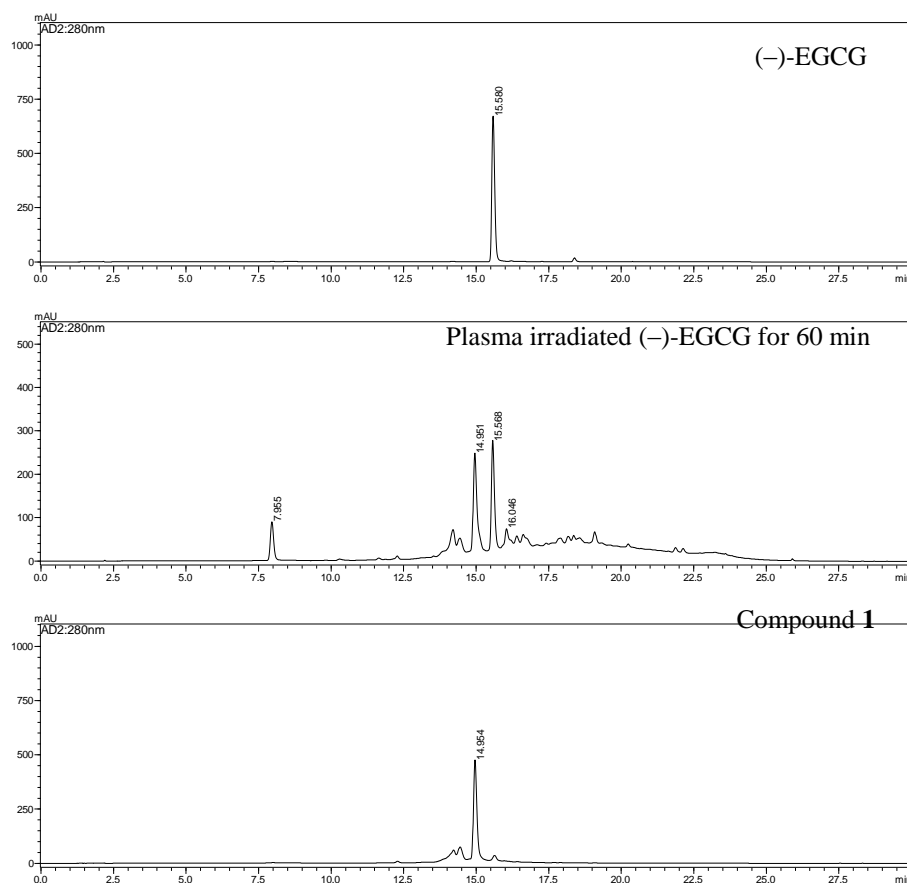

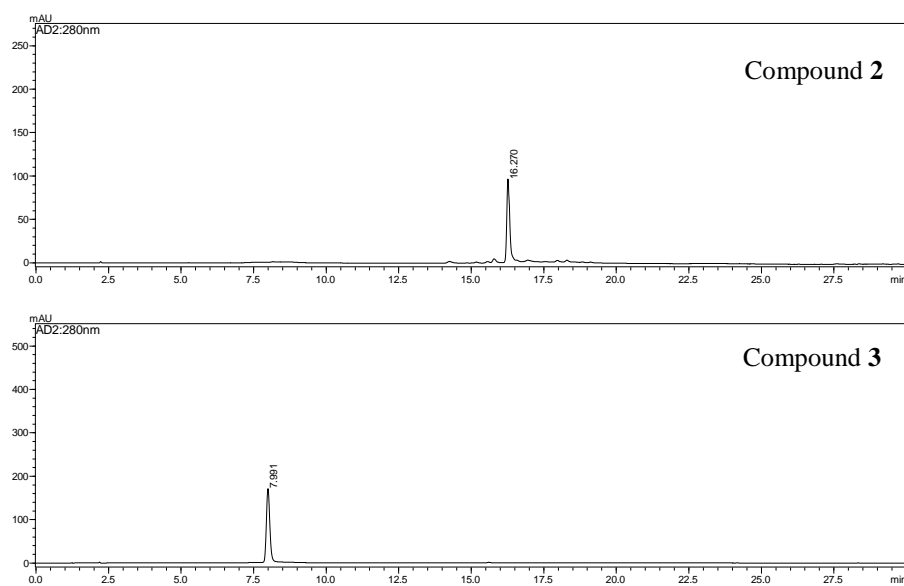

**Figure S2.** HPLC chromatograms of isolated compounds **1-3**.

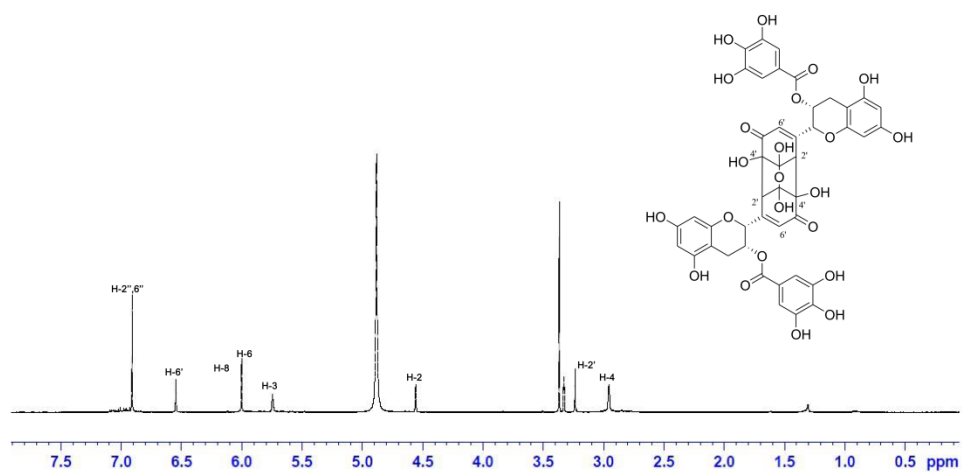

**Figure S3.**  $^1\text{H}$  NMR spectrum of compound **1** in  $\text{CD}_3\text{OD}$ .

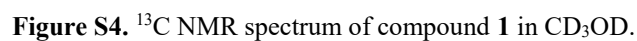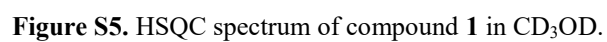



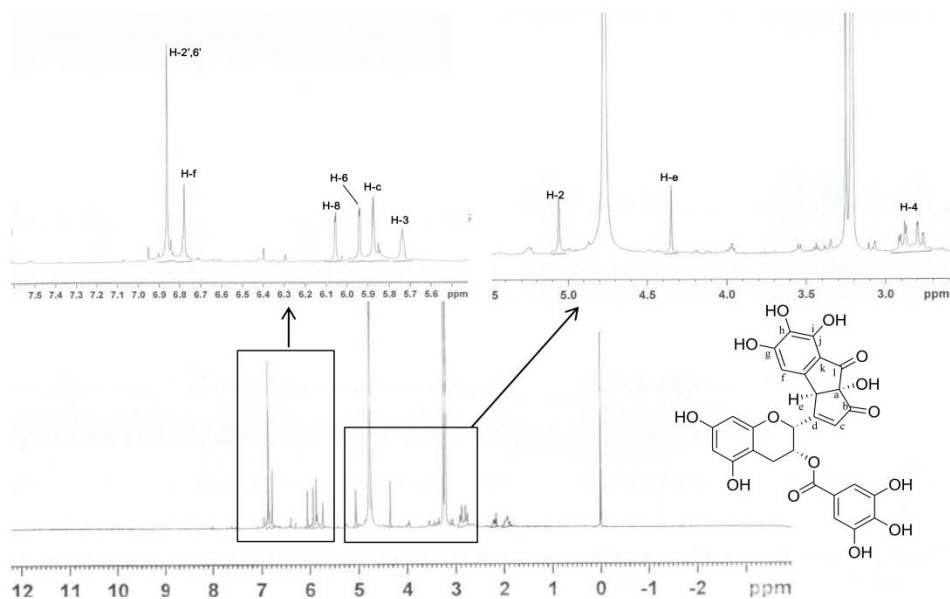

**Figure S8.**  $^1\text{H}$  NMR spectrum of compound **2** in  $\text{CD}_3\text{OD}$ .

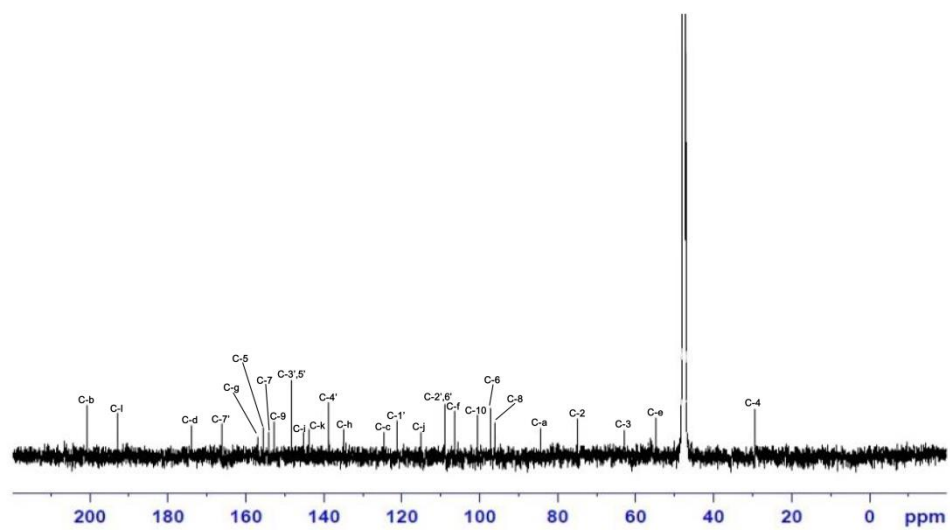

**Figure S9.**  $^{13}\text{C}$  NMR spectrum of compound **2** in  $\text{CD}_3\text{OD}$ .

[ Mass Spectrum ]  
 Data : FAB530 Date : 15-Jan-2020 17:25  
 Instrument : MStation  
 Sample : WEP-05  
 Note : m-NBA  
 Inlet : Direct Ion Mode : FAB-  
 Spectrum Type : Normal Ion [MF-Linear]  
 RT : 2.00 min Scan# : (11,13) Temp : 3276.7 deg.C  
 BP : m/z 153 Int. : 481.88 (5052906)  
 Output m/z range : 10 to 700 Out Level : 0.00 %

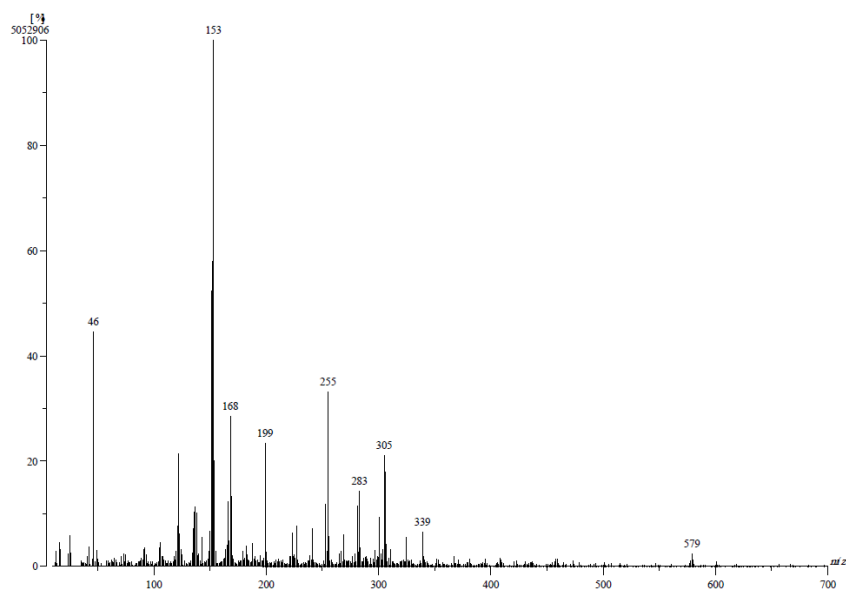

**Figure S10.** FABMS spectrum of compound **2**.

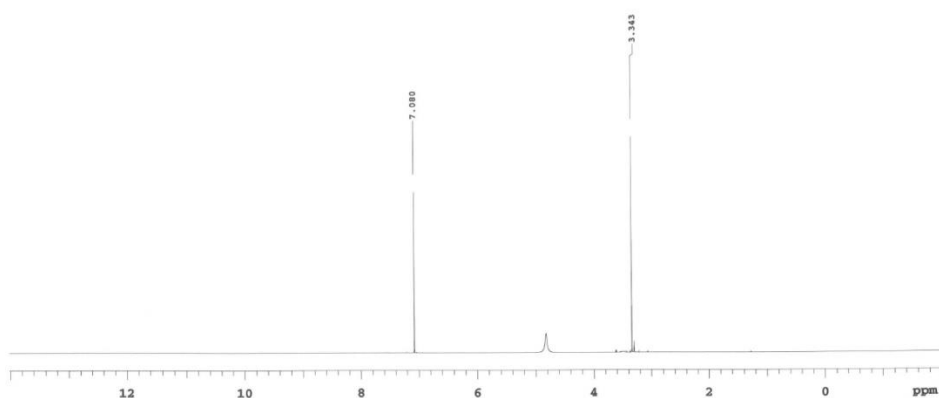

**Figure S11.** <sup>1</sup>H NMR spectrum of compound **3** in CD<sub>3</sub>OD.

EGCG quinone dimer A (**1**): Brown amorphous powder,  $[\alpha]_D^{25}$  -62.3 (*c* 0.1, MeOH), FABMS *m/z* 929 [M-H]<sup>-</sup>, <sup>1</sup>H NMR (500 MHz, CD<sub>3</sub>OD):  $\delta$  6.92 (4H, s, H-2'', 6''), 6.54 (2H, d, *J* = 1.0 Hz, H-6'), 6.03 (2H, d, *J* = 2.0 Hz, H-8), 5.99 (2H, d, *J* = 2.0 Hz, H-6), 5.68 (2H, br dd, *J* = 4.0, 1.0 Hz, H-3), 4.56 (2H, br s, H-2), 3.22 (2H, br s, H-2'), 2.95 (2H, m, H-4), 2.93 (2H, m, H-4), <sup>13</sup>C NMR (125 MHz, CD<sub>3</sub>OD):  $\delta$  196.5 (C-5'), 165.9 (C-7''), 156.6 (C-7), 156.5 (C-9), 155.8 (C-1'), 154.4 (C-5), 144.9 (C-3'', 5''), 138.5 (C-4''), 126.7 (C-6'), 119.6 (C-1''), 108.9 (C-2''),



6"), 103.7 (C-3'), 97.7 (C-10), 95.6 (C-8), 94.4 (C-6), 84.7 (C-4'), 75.9 (C-2), 63.8 (C-3), 59.2 (C-2'), 25.2 (C-4).

Theacitrinin A (**2**): Brown amorphous powder,  $[\alpha]_D^{25} +104.8$  (*c* 0.1, MeOH), FABMS  $m/z$  579  $[M-H]^-$ ,  $^1H$  NMR (500 MHz, CD<sub>3</sub>OD):  $\delta$  6.95 (2H, s, H-2', 6'), 6.71 (1H, s, H-f), 6.05 (1H, d,  $J = 2.0$  Hz, H-8), 5.98 (1H, d,  $J = 2.0$  Hz, H-6), 5.85 (1H, br s, H-c), 5.73 (1H, m, H-3), 5.23 (1H, br s, H-2), 4.35 (1H, s, H-e), 2.91 (1H, dd,  $J = 17.0$ , 4.0 Hz, H-4), 2.80 (1H, dd,  $J = 17.0$ , 1.0 Hz, H-4),  $^{13}C$  NMR (125 MHz, CD<sub>3</sub>OD):  $\delta$  200.1 (C-b), 193.9 (C-l), 174.0 (C-d), 166.0 (C-7'), 157.0 (C-g), 156.9 (C-5), 156.1 (C-7), 155.0 (C-9), 148.2 (C-3', 5'), 145.1 (C-i), 143.0 (C-k), 138.9 (C-4'), 134.0 (C-h), 125.0 (C-c), 122.0 (C-1'), 115.0 (C-j), 108.8 (C-2', 6'), 106.1 (C-f), 100.4 (C-10), 97.2 (C-6), 95.9 (C-8), 84.8 (C-a), 73.1 (C-2), 63.0 (C-3), 54.8 (C-e), 29.0 (C-4).

Gallic acid (**3**): White amorphous powder,  $^1H$  NMR (500 MHz, CD<sub>3</sub>OD):  $\delta$  7.08 (2H, s, H-2, 6).

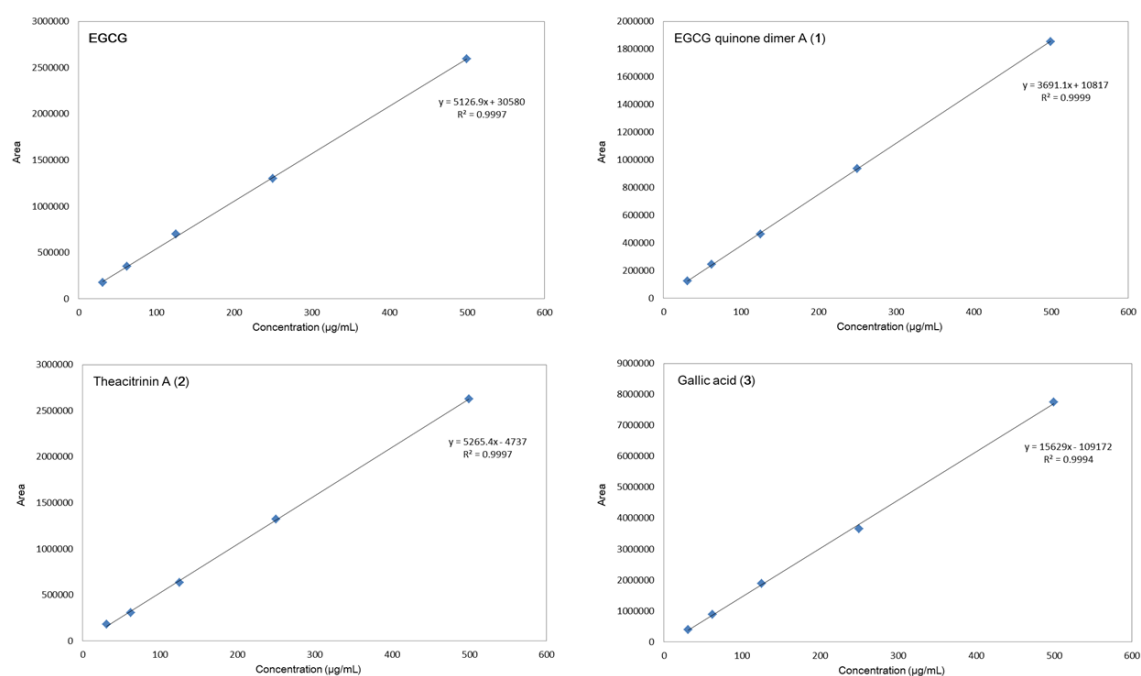

| Compounds | $t_R$ (min) | UV $\lambda_{max}$ (nm) | $[M-H]^-$ | Regression equation <sup>a</sup> | Linear range |
|-----------|-------------|-------------------------|-----------|----------------------------------|--------------|
|           |             |                         |           | ( $Y=aX+b, R^2$ )                | (µg/mL)      |
| (-)-EGCG  | 15.6        | 224, 280                | 457       | $Y = 5126.9X + 30580, 0.9997$    | 500-31.25    |
| <b>1</b>  | 15.0        | 276                     | 929       | $Y = 3691.1X + 10817, 0.999$     | 500-31.25    |
| <b>2</b>  | 16.2        | 277, 345                | 579       | $Y = 5265.4X - 4737, 0.9997$     | 500-31.25    |
| <b>3</b>  | 8.0         | 214, 268                | 169       | $Y = 15629X - 109172, 0.9994$    | 500-31.25    |

<sup>a</sup>  $Y$  = peak area and  $X$  = concentration.

**Figure S12.** Calibration curve of EGCG and oxidation products **1-3**.

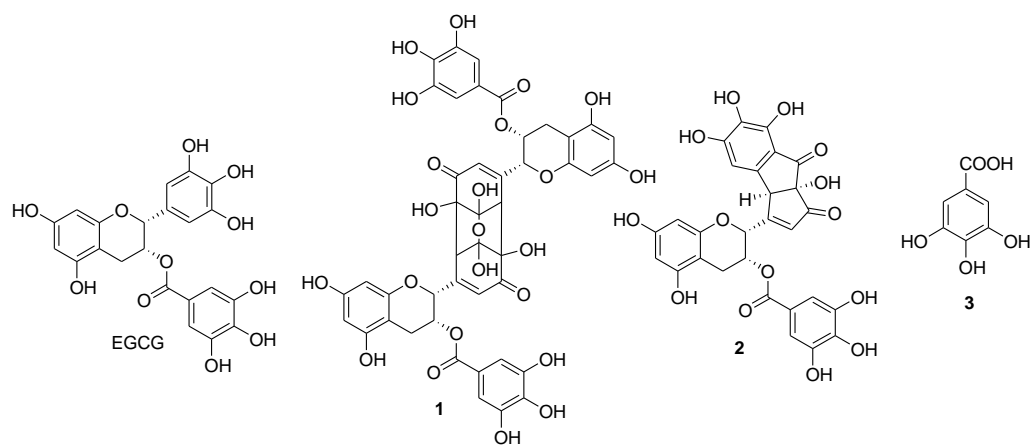

**Figure S13.** Chemical structures of isolated compounds 1-3.
